# Supplementary material for: An Integrative Inflammatory Nutritional Model for Predicting Postoperative Venous Thromboembolism in Locally Advanced Gastric Cancer receiving Surgery plus Prophylactic Hyperthermic Intraperitoneal Chemotherapy
Source: Research Square preprint supplement (doi:10.21203/rs.3.rs-7531992/v1), 2025-10-08
Supplement: Supplementary file 1 [file 335b88ffafe6516f33ceb589.docx]

Supplementary Table S1. Clinical and pathological characteristics between training set and validation set.

| Characteristic | | Total (n=1029) | training set (n=720) | validation set (n=309) | P value |
| --- | --- | --- | --- | --- | --- |
| VTE, n (%) | Yes / No | 130 (12.6) / 899 (87.4) | 92 (12.8) / 628 (87.2) | 38 (12.3) / 271 (87.7) | 0.832 |
| Sex, n (%) | Male / Female | 797 (77.5) / 232 (22.5) | 556 (77.2) / 164 (22.8) | 241 (78.0) / 68 (22.0) | 0.786 |
| Age (years), n (%) | ≤ 65 / > 65 | 513 (49.9) / 516 (50.1) | 358 (49.7) / 362 (50.3) | 155 (50.2) / 154 (49.8) | 0.897 |
| BMI (kg/m2), n (%) | <18.5  18.5-24.9  ≥ 25 | 147 (14.3)  570 (55.4)  312 (30.3) | 96 (13.3)  407 (56.5)  217 (30.1) | 51 (16.5)  163 (52.8)  95 (30.7) | 0.349 |
| Smoking, n (%) | Yes / No | 553 (53.7) / 476 (46.3) | 378 (52.5) / 342 (47.5) | 175 (56.6) / 134 (43.4) | 0.223 |
| Alcohol, n (%) | Yes / No | 397 (38.6) / 632 (61.4) | 276 (38.3) / 444 (61.7) | 121 (39.2) / 188 (60.8) | 0.803 |
| NRS-2002, n (%) | < 3 / ≥ 3 | 343 (33.3) / 686 (66.7) | 248 (34.4) / 472 (65.6) | 95 (30.7) / 214 (69.3) | 0.248 |
| Hypertension, n (%) | Yes / No | 325 (31.6) / 704 (68.4) | 233 (32.4) / 487 (67.6) | 92 (29.8) / 217 (70.2) | 0.413 |
| Diabetes, n (%) | Yes / No | 136 (13.2) / 893 (86.8) | 90 (12.5) / 630 (87.5) | 46 (14.9) / 263 (85.1) | 0.300 |
| CCVD, n (%) | Yes / No | 327 (31.8) / 702 (68.2) | 221 (30.7) / 499 (69.3) | 106 (34.3) / 203 (65.7) | 0.254 |
| Respiratory disease, n (% | Yes / No | 275 (26.7) / 754 (73.3) | 188 (26.1) / 532 (73.9) | 87 (28.2) / 222 (71.8) | 0.497 |
| Neoadjuvant chemotherapy, n (%) | Yes / No | 196 (19.0) / 833 (81.0) | 132 (18.3) / 588 (81.7) | 64 (20.7) / 245 (79.3) | 0.373 |
| Preoperative ASA score, n (%) | I–II / III | 716 (69.6) / 313 (30.4) | 503 (69.9) / 217 (30.1) | 213 (68.9) / 96 (31.1) | 0.767 |
| Cycle of p-HIPEC, n (%) | 2 / 3 | 649 (63.1) / 380 (36.9) | 452 (62.8) / 268 (37.2) | 197 (63.8) / 112 (36.2) | 0.766 |
| Operative approach, n (%) | Open  Laparoscopic  Robotic | 107 (10.4)  793 (77.1)  129 (12.5) | 84 (11.7)  544 (75.6)  92 (12.8) | 23 (7.4)  249 (80.6)  37 (12.0) | 0.104 |
| Operative duration (min), n (%) | < 200 / ≥ 200 | 430 (41.8) / 599 (58.2) | 305 (42.4) / 415 (57.6) | 125 (40.5) / 184 (59.5) | 0.569 |
| Intraoperative blood loss (ml), n (%) | < 120 / ≥ 120 | 744 (72.3) / 285 (27.7) | 524 (72.8) / 196 (27.2) | 220 (71.2) / 89 (28.8) | 0.604 |
| Postoperative ICU admission, n (%) | Yes / No | 186 (18.1) / 843 (81.9) | 121 (16.8) / 599 (83.2) | 65 (21.0) / 244 (79.0) | 0.106 |
| Tumor location, n (%) | Upper  Middle  Lower  Multiple parts | 40 (3.9)  200 (19.4)  681 (66.2)  108 (10.5) | 25 (3.5)  138 (19.2)  479 (66.5)  78 (10.8) | 15 (4.9)  62 (20.1)  202 (65.4)  30 (9.7) | 0.692 |
| Tumor size (cm), n (%) | < 6.45 / ≥ 6.45 | 694 (67.4) / 335 (32.6) | 491 (68.2) / 229 (31.8) | 203 (65.7) / 106 (34.3) | 0.433 |
| T stage, n (%) | T3 / T4 | 316 (30.7) / 713 (69.3) | 226 (31.4) / 494 (68.6) | 90 (29.1) / 219 (70.9) | 0.471 |
| N stage, n (%) | N0  N1  N2  N3 | 40 (3.9)  201 (19.5)  321 (31.2)  467 (45.4) | 30 (4.2)  143 (19.9)  226 (31.4)  321 (44.6) | 10 (3.2)  58 (18.8)  95 (30.7)  146 (47.2) | 0.806 |
| LVI, n (%) | Yes / No | 737 (71.6) / 292 (28.4) | 524 (72.8) / 196 (27.2) | 213 (68.9) / 96 (31.1) | 0.210 |
| Nerve invasion, n (%) | Yes / No | 856 (83.2) /173 (16.8) | 607 (84.3) / 113 (15.7) | 249 (80.6) / 60 (19.4) | 0.143 |
| CEA (ng/ml), n (%) | < 4.00 / ≥ 4.00 | 767 (74.5) / 262 (25.5) | 530 (73.6) / 190 (26.4) | 237 (76.7) / 72 (23.3) | 0.297 |
| AFP (ng/ml), n (%) | < 1.80 / ≥ 1.80 | 158 (15.4) / 871 (84.6) | 113 (15.7) / 607 (84.3) | 45 (14.6) / 264 (85.4) | 0.644 |
| CA199 (U/ml), n (%) | < 6.25 / ≥ 6.25 | 263 (25.6) / 766 (74.4) | 190 (26.4) / 530 (73.6) | 73 (23.6) / 236 (76.4) | 0.351 |
| Caprini score, median (Q25, Q75) | | 8.0 (7.0, 9.0) | 8.0 (7.0, 9.0) | 8.0 (7.0, 10.0) | 0.227 |
| CVC | Yes / No | 416 (40.4) / 613 (59.6) | 296 (41.1) / 424 (58.9) | 120 (38.8) / 189 (61.2) | 0.495 |
| LEVVs | Yes / No | 95 (9.2) / 934 (90.8) | 67 (9.3) / 653 (90.7) | 28 (9.1) / 281 (90.9) | 0.901 |
| High-APTT (sec) | Yes / No | 699 (67.9) / 330 (32.1) | 492 (68.3) / 228 (31.7) | 207 (67.0) / 102 (33.0) | 0.672 |
| High-PT (sec) | Yes / No | 231 (22.4) / 798 (77.6) | 152 (21.1) / 568 (78.9) | 79 (25.6) / 230 (74.4) | 0.116 |
| High-FIB (g/L) | Yes / No | 412 (40.0) / 617 (60.0) | 291 (40.4) / 429 (59.6) | 121 (39.2) / 188 (60.8) | 0.706 |
| High-D-dimer (ng/ml) | Yes / No | 357 (34.7) / 672 (65.3) | 252 (35.0) / 468 (65.0) | 105 (34.0) / 204 (66.0) | 0.753 |

Y, Yes; N, No; APTT, activated partial thromboplastin time; AFP, alpha fetoprotein; ASA, American society of Aneshesiologists, BMI, body mass index; CA199, Carbohydrate antigen199; CCVD, cardio-cerebral vascular disease; CEA, carcinoembryonic antigen; CVC, central venous catheter; FIB, fibrinogen; ICU, intensive care unit; LEVVs, lower extremity varicose veins; LVI, lymphovascular invasion; NRS-2002, nutrition risk screening 2002; NED, neuroendocrine differentiation; PT, prothrombin time; p-HIPEC, prophylactic hyperthermic intraperitoneal chemotherapy; T2-DM, Diabetes mellitus type 2; VTE, venous thromboembolism.

* P<0.05 was considered significant.

Supplementary Table S2. Comparison of the inflammatory nutrition indicators and body composition parameters between training set and validation set.

| Variables | | Total  (n=1029) | training set  (n=720) | validation set  (n=309) | P value |
| --- | --- | --- | --- | --- | --- |
| High-PLR | Y **/** N | 734 (71.3) / 295 (28.7) | 508 (70.6) / 212 (29.4) | 226 (73.1) / 83 (26.9) | 0.401 |
| High-NLR | Y **/** N | 544 (52.9) / 485 (47.1) | 385 (53.5) / 335 (46.5) | 159 (51.5) / 150 (48.5) | 0.553 |
| High-CAR | Y **/** N | 155 (15.1) / 874 (84.9) | 105 (14.6) / 615 (85.4) | 50 (16.2) / 259 (83.8) | 0.511 |
| High-IBI | Y **/** N | 372 (36.2) / 657 (63.8) | 273 (37.9) / 447 (62.1) | 99 (32.0) / 210 (68.0) | 0.072 |
| High-SIRI | Y **/** N | 472 (45.9) / 557 (54.1) | 334 (46.4) / 386 (53.6) | 138 (44.7) / 171 (55.3) | 0.610 |
| High-SII | Y **/** N | 330 (32.1) / 699 (67.9) | 236 (32.8) / 484 (67.2) | 94 (30.4) / 215 (69.6) | 0.458 |
| High-PNI | Y **/** N | 560 (54.4) / 469 (45.6) | 402 (55.8) / 318 (44.2) | 158 (51.1) / 151 (48.9) | 0.165 |
| High-NHR | Y **/** N | 335 (32.6) / 694 (67.4) | 235 (32.6) / 485 (67.4) | 100 (32.4) / 209 (67.6) | 0.931 |
| High-FAR | Y **/** N | 470 (45.7) / 559 (54.3) | 326 (45.3) / 394 (54.7) | 144 (46.6) / 165 (53.4) | 0.696 |
| Low-SMI | Y **/** N | 427 (41.5) / 602 (58.5) | 308 (42.8) / 412 (57.2) | 119 (38.5) / 190 (61.5) | 0.203 |
| Low-VATI | Y **/** N | 587 (57.0) / 442 (43.0) | 408 (56.7) / 312 (43.3) | 179 (57.9) / 130 (42.1) | 0.708 |
| Low-SATI | Y **/** N | 612 (59.5) / 417 (40.5) | 421 (58.5) / 299 (41.5) | 191 (61.8) / 118 (38.2) | 0.317 |
| Low-TATI | Y **/** N | 775 (75.3) / 254 (24.7) | 534 (74.2) / 186 (25.8) | 241 (78.0) / 68 (22.0) | 0.192 |
| Low-SMD | Y **/** N | 356 (34.6) / 673 (65.4) | 252 (35.0) / 468 (65.0) | 104 (33.7) / 205 (66.3) | 0.678 |
| Low-SD | Y **/** N | 555 (53.9) / 474 (46.1) | 396 (55.0) / 324 (45.0) | 159 (51.5) / 150 (48.5) | 0.296 |
| Low-VD | Y **/** N | 322 (31.3) / 707 (68.7) | 230 (31.9) / 490 (68.1) | 92 (29.8) / 217 (70.2) | 0.491 |
| High-IMAC | Y **/** N | 523 (50.8) / 506 (49.2) | 371 (51.5) / 349 (48.5) | 152 (49.2) / 157 (50.8) | 0.492 |
| High-VSR | Y **/** N | 562 (54.6) / 467 (45.4) | 388 (53.9) / 332 (46.1) | 174 (56.3) / 135 (43.7) | 0.474 |

Y, Yes; N, No; PLR, platelet-to-lymphocyte ratio; NLR, neutrophil-to-lymphocyte ratio; IBI, inflammatory burden index; SIRI, systemic inflammation response index; SII，systemic immune-inflammation index; PNI，prognostic nutritional index; SMI, skeletal muscle index; VATI, visceral adipose tissue index；SATI, subcutaneous adipose tissue index；TATI, total adipose tissue index； SMD, skeletal muscle density; SD, subcutaneous adipose density; VD, visceral adipose density；IMAC, intramuscular adipose tissue content; VSR, visceral to subcutaneous adipose tissue area ratio.

* P<0.05 was considered significant.


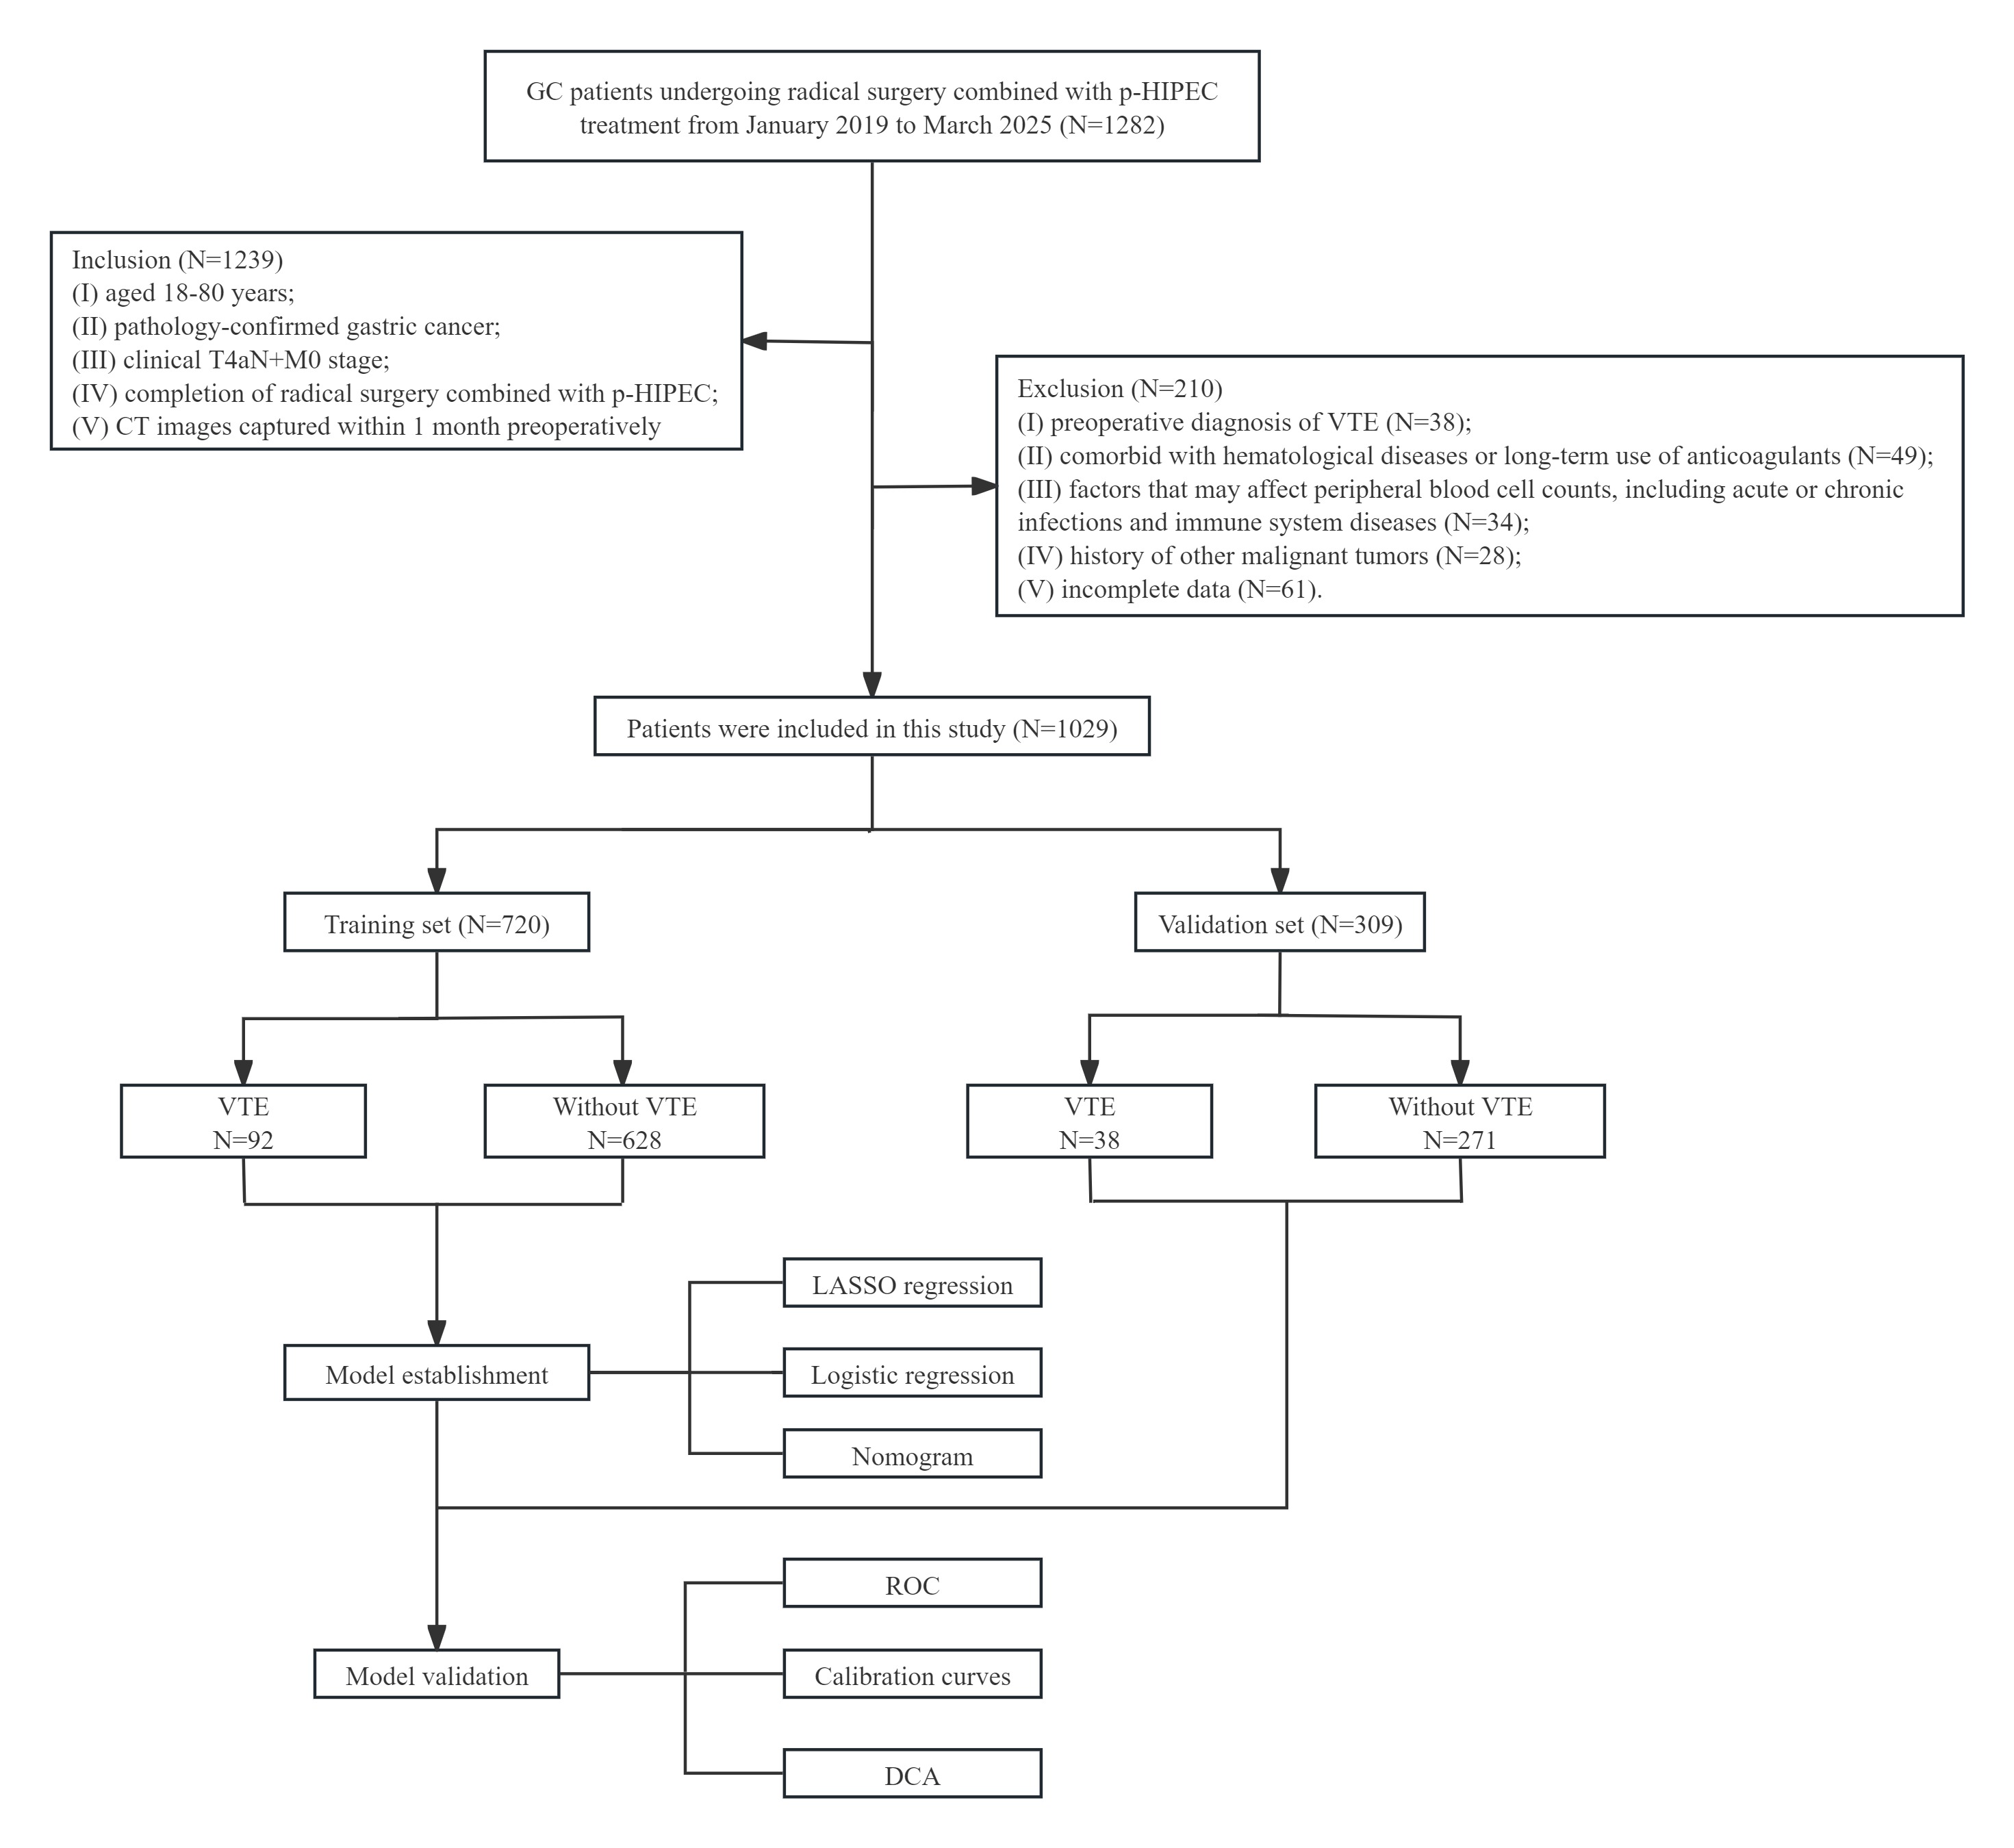


Supplementary Figure S1. Flow diagram of study design. ASA, American Society of Anesthesiologists; RS, radical surgery; CT, computed tomography; GC, gastric cancer; LAGC, locally advanced gastric cancer; LASSO, least absolute shrinkage and selection operator; p-HIPEC, prophylactic hyperthermic intraperitoneal chemotherapy; ROC, receiver operating characteristic curve; DCA, decision curve analysis.





Supplementary Figure S2. Cross-sectional computed tomography images of the third lumbar vertebra used to quantify body composition parameters. The red, yellow, blue, and green shaded regions show the skeletal muscle area (SMA), visceral adipose tissue area (VATA), subcutaneous adipose tissue area (SATA) and intramuscular adipose tissue area (IMATA), respectively.
